# Supplementary material for: Prediction of Histopathologic Growth Patterns of Colorectal Liver Metastases with a Noninvasive Imaging Method
Source: Springer Nature journal article supplement (doi:10.1245/s10434-019-07910-x), 2019-10-11
Supplement: MOESM1 [file 17265172]

**Supplemental Table 1** Features used in this experiment

| ***First Order Statistic Features (15)*** | |
| --- | --- |
| **Reference** | **Feature** |
| —— | Energy  Entropy |
| Kurtosis  Maximum  Mean  Mean absolute deviation  Median  Minimum  Range  Root mean square  Skewness  Standard deviation  Uniformity  Variance  Sum |

| **Textural Features (45)** | |
| --- | --- |
| ***GLCM Features (16)*** | |
| **Reference** | **Feature** |
| Galloway 1975 [4] | Autocorrelation  Cluster prominence  Cluster shade  Cluster tendency  Contrast  Correlation  Difference entropy  Energy  Entropy  Information measure of correlation 1  Information measure of correlation 2  Inverse difference moment normalized  Inverse difference normalized  Inverse variance  Maximum probability  Sum average |

| ***GLRLM Features (11)*** | |
| --- | --- |
| **Reference** | **Feature** |
| Galloway 1975 [4] | Short Run Emphasis (SRE) |
|  | Long Run Emphasis (LRE) |
|  | Gray Level Non-Uniformity (GLN) |
|  | Run Length Non-Uniformity (RLN) |
|  | Run Percentage (RP) |
| Chu et al. 1990 [5] | Low Gray Level Run Emphasis (LGLRE) |
|  | High Gray Level Run Emphasis (HGLRE) |
| Dasarathy and Holder 1991 [6] | Short Run Low Gray Level Emphasis (SRLGLE) |
|  | Short Run High Gray Level Emphasis (SRHGLE) |
|  | Long Run Low Gray Level Emphasis (LRLGLE) |
|  | Long Run High Gray Level Emphasis (LRHGLE) |

| ***GLSZM Features (13)*** | |
| --- | --- |
| **Reference** | **Feature** |
| Galloway 1975 [4] | Small Zone Emphasis (SZE) |
|  | Large Zone Emphasis (LZE) |
|  | Gray-Level Non-uniformity (GLN) |
|  | Zone-Size Non-uniformity (ZSN) |
|  | Zone Percentage (ZP) |
| Chu et al. 1990 [5] | Low Gray-Level Zone Emphasis (LGZE) |
|  | High Gray-Level Zone Emphasis (HGRE) |
| Dasarathy and Holder 1991 [6] | Small Zone Low Gray-Level Emphasis (SZLGE) |
|  | Small Zone High Gray-Level Emphasis (SZHGE) |
|  | Large Zone Low Gray-Level Emphasis (LZLGE) |
|  | Large Zone High Gray-Level Emphasis (LZHGE) |
| Thibault et al. 2009 [3] | Gray-Level Variance (GLV) |
|  | Zone-Size Variance (ZSV) |

| ***NGTDM Features (5)*** | |
| --- | --- |
| **Reference** | **Feature** |
| Amadasun and King 1989 [7] | Coarseness |
|  | Contrast |
|  | Busyness |
|  | Complexity |
|  | Strength |

We applied undecimated 3-dimensional wavelet transformation to decompose the original image into 8 parts. L and H indicate low- and high-pass functions, respectively. The wavelet decompositions of the original image X were labeled as XLLL, XLLH, XLHL, XLHH, XHLL, XHLH, XHLH, and XHHH. For example, XLLH represents the image filtered with low-pass function in the x- and y-directions, and high-pass function in the z-direction, as follows:

=

Where is the length of filter L, Nh is the length of filter H.

**Supplemental table 2. Selected features for single radiomics signatures construction.**

| Arterial phase | Portal Venous phase | Plain phase |
| --- | --- | --- |
| ori_fos_energy | ori_fos_energy | ori_fos_energy |
| Coif7_glszm_GLV | Coif7_glszm_GLV | ori_fos_median |
| ori_fos_median | ori_fos_median | ori_fos_maximum |
| ori_fos_minimum | Coif7_glszm_HGLZE | Coif7_glszm_GLV |
| Coif6_glszm_ZSNU | Coif4_glszm_ZSNU | Coif6_glszm_GLNU |
| Coif4_glszm_ZSNU | Coif4_glszm_GLNU | Coif4_glszm_GLV |
| ori_fos_range | Coif6_glszm_ZSNU | Coif6_glszm_ZSNU |
| Coif4_glszm_HGLZE | Coif3_fos_minimum | Coif4_glszm_ZSNU |
| Coif3_glszm_ZSNU | Coif4_fos_maximum | Coif5_glszm_ZSNU |
| ori_glszm_GLV | Coif5_glszm_ZSNU | Coif4_glszm_HGLZE |
| Coif3_fos_minimum | Coif5_glszm_GLNU | Coif4_glszm_GLNU |
| Coif5_glszm_ZSNU | Coif2_fos_minimum | Coif4_glszm_LGLZE |
| Coif7_fos_maximum | ori_glszm_GLNU | Coif3_glszm_ZSNU |
| Coif7_fos_minimum | Coif2_fos_median | Coif5_glszm_GLNU |
| Coif7_fos_range | Coif4_fos_minimum | Coif4_fos_entropy |
| Coif2_glszm_ZSNU | Coif7_fos_maximum | Coif4_fos_uniformity |
| Coif4_fos_maximum | Coif4_fos_range | Coif5_fos_entropy |
| Coif2_glszm_GLNU | Coif8_fos_maximum | Coif3_glszm_GLV |
| ori_glszm_LGLZE | Coif5_fos_maximum | Coif5_fos_uniformity |
| ori_glszm_GLNU | Coif5_fos_range | Coif2_fos_minimum |

**Supplemental table 3. Comparisons between various models in predictive performance of HGP based on Delong-test**

| DeLong test | | Training *p* value | | Validation *p* value |
| --- | --- | --- | --- | --- |
| Clinical model&radiomics | | | < 0.001 | <0.001 |
| Clinical&combined | < 0.001 | | | 0.048 |
| Quantitative&radiomics | 0.002 | | | 0.012 |
| Quantitative&combined | < 0.001 | | | 0.235 |
| Radiomics&combined | 0.317 | | | 0.128 |

**
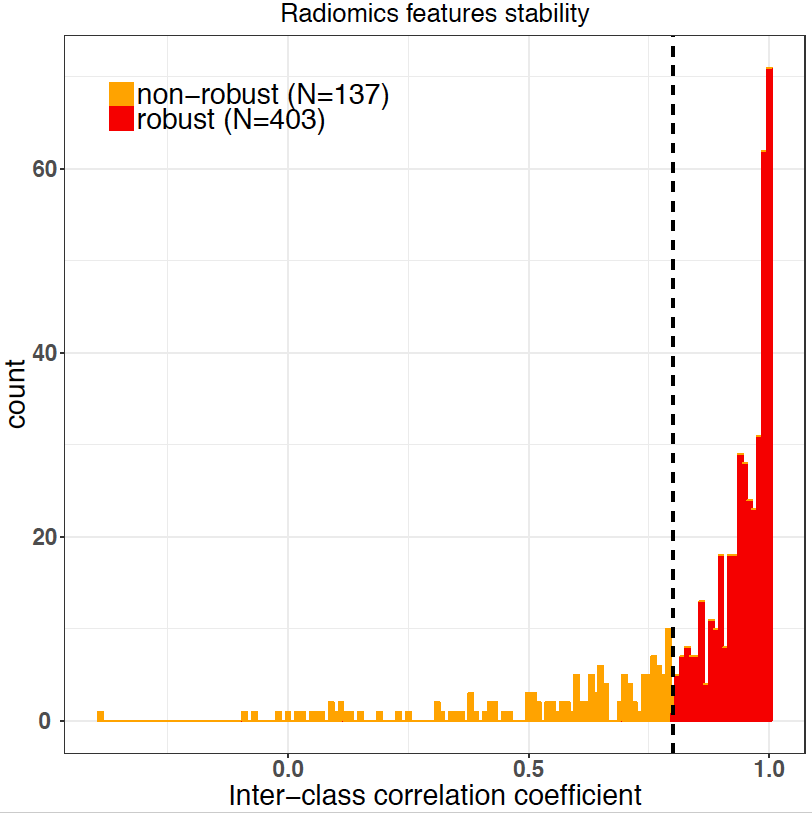
**

**Supplemental Fig 1a**. Inter-observer reproducibility of radiomics features on pre-contrast phase.

**
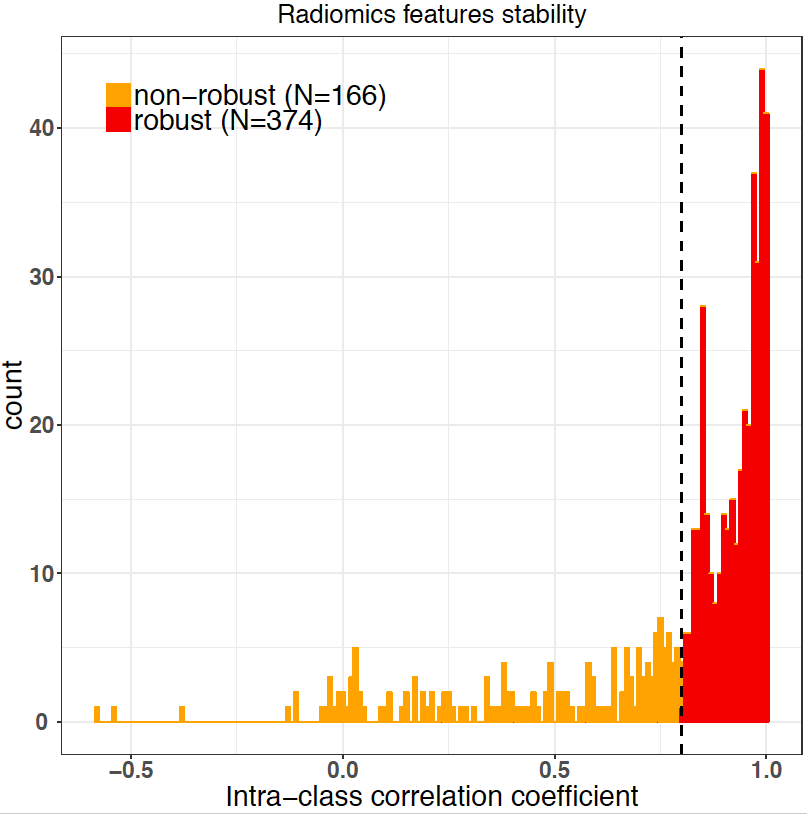
**

**Supplemental Fig 1b**. Intra-observer reproducibility of radiomics features on pre-contrast phase.

**
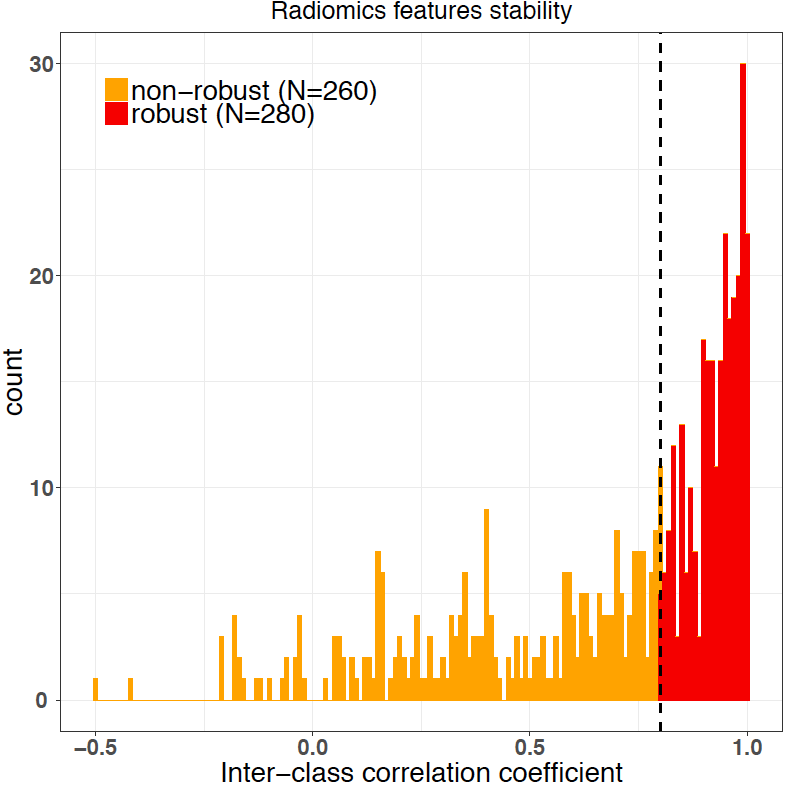
**

**Supplemental Fig 1c**. Inter-observer reproducibility of radiomics features on arterial phase.

**
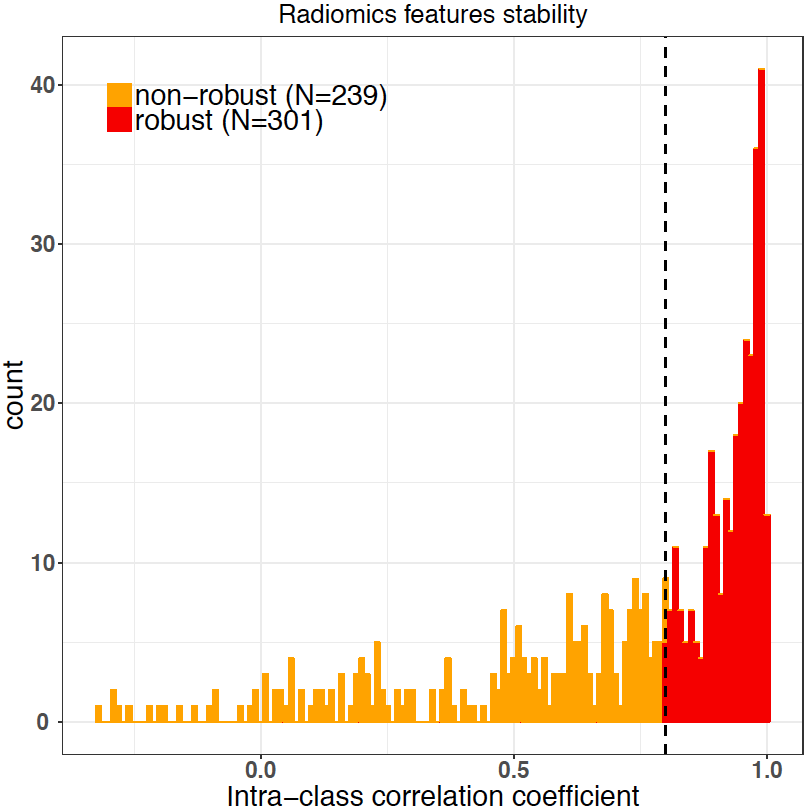
**

**Supplemental Fig 1d**. Intra-observer reproducibility of radiomics features on arterial phase.

**
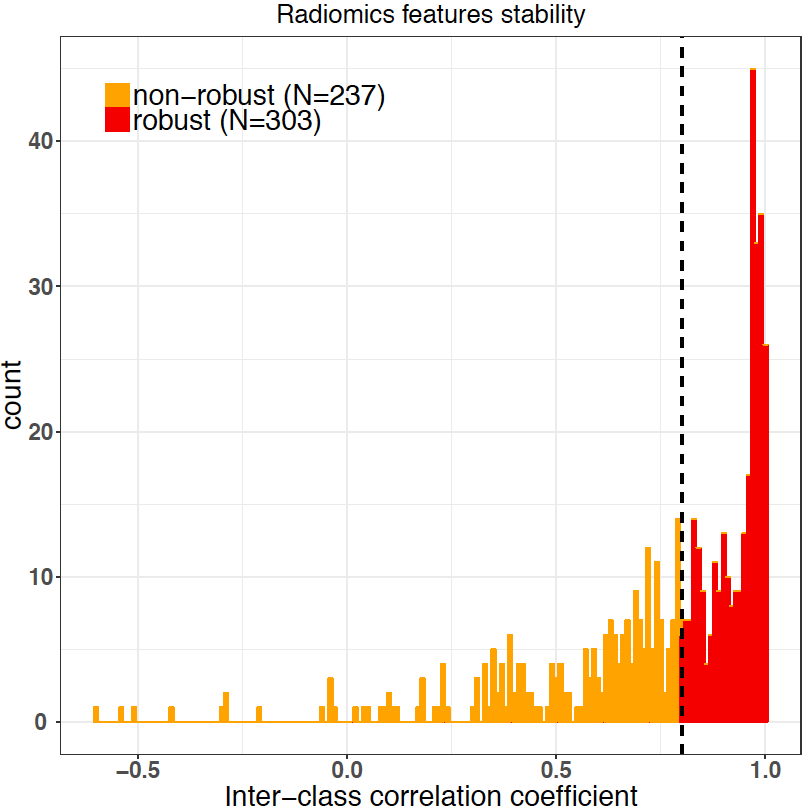
**

**Supplemental Fig 1e**. Inter-observer reproducibility of radiomics features on portal venou phase.

**
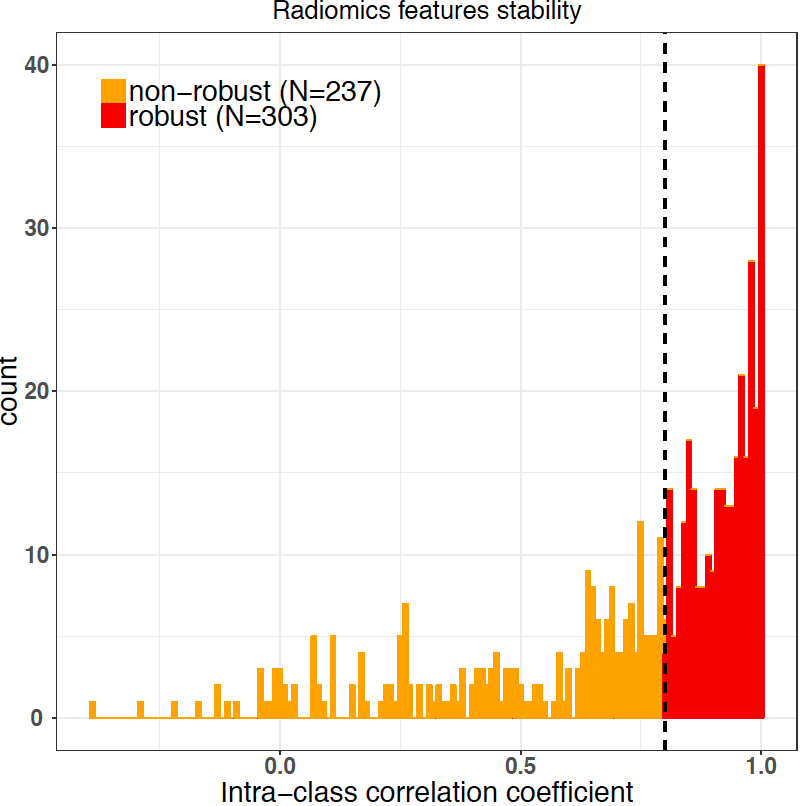
**

**Supplemental Fig 1f.** Intra-observer reproducibility of radiomics features on portal venous phase.

**
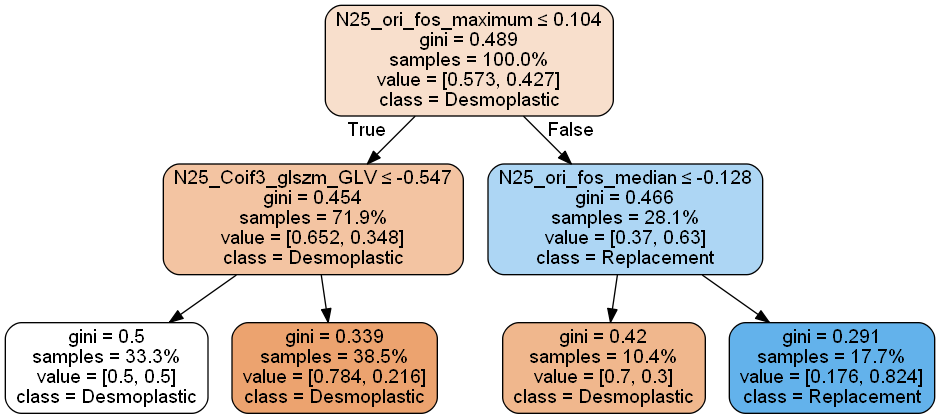
**

**Supplemental Fig 2a.** The decision tree of the radiomics signature on pre-contrast phase.

**
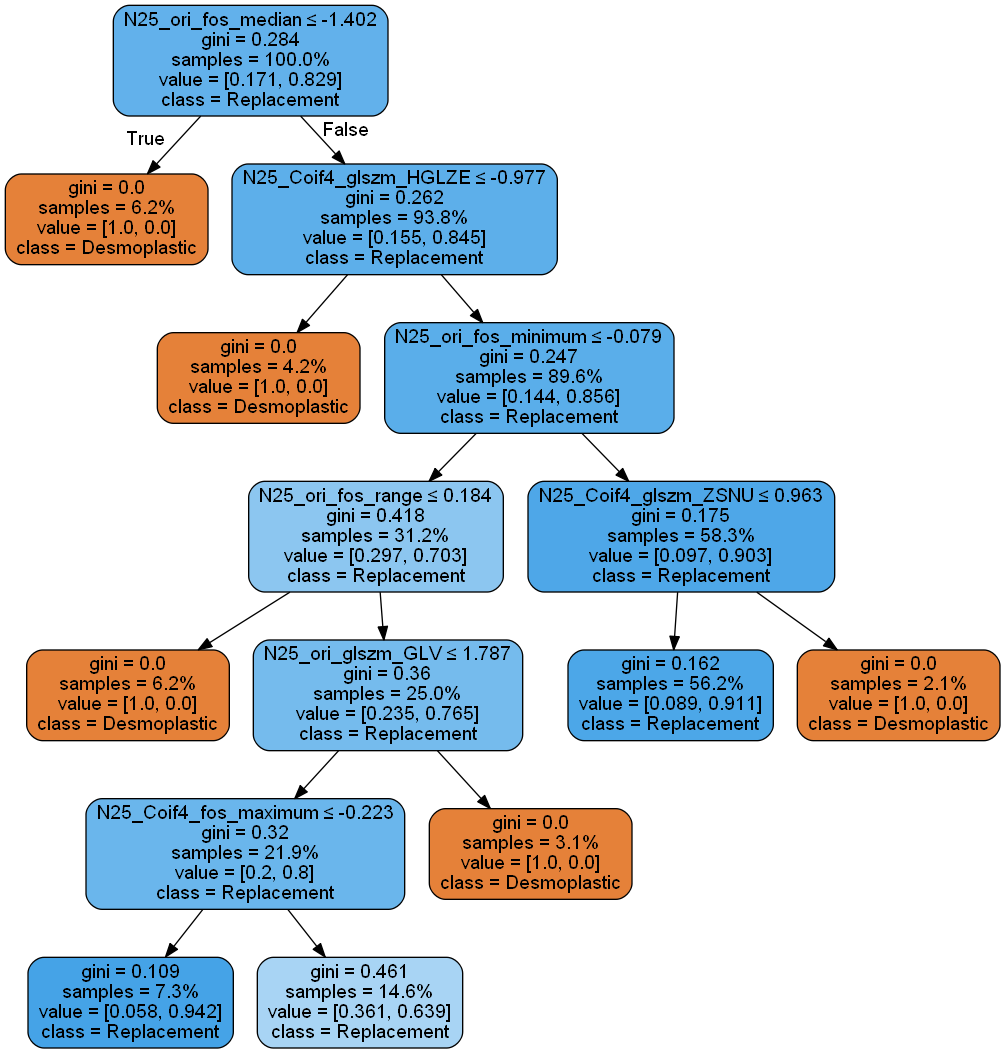
**

**Supplemental Fig 2b.** The decision tree of the radiomics signature on arterial phase.

**
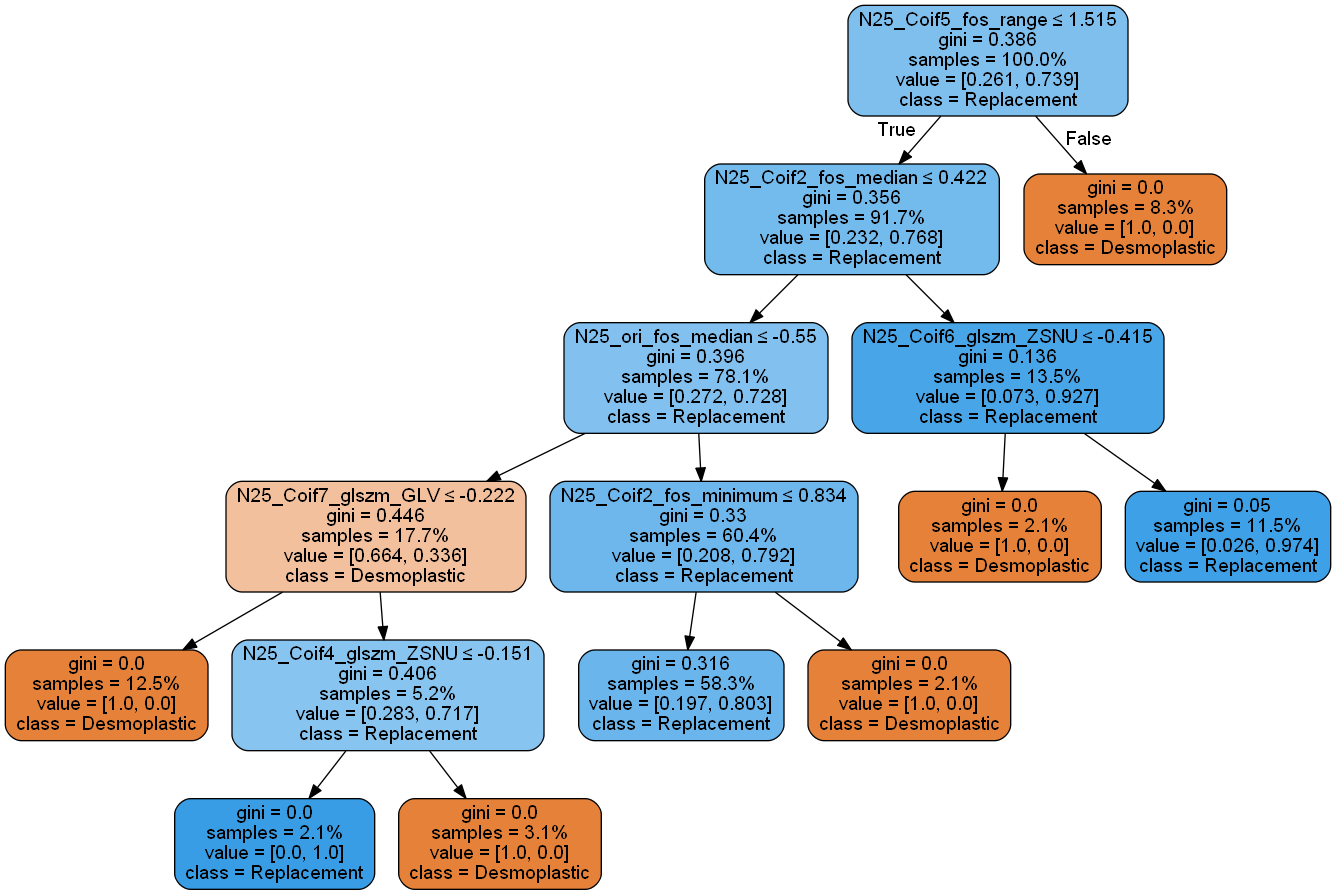
**

**Supplemental Fig 2c.** The decision tree of the radiomics signature on portal venous phase.
